# Supplementary material for: Epigenetic-based combinatorial resveratrol and pterostilbene alters DNA damage response by affecting SIRT1 and DNMT enzyme expression, including SIRT1-dependent γ-H2AX and telomerase regulation in triple-negative breast cancer
Source: Springer Nature journal article supplement (doi:10.1186/s12885-015-1693-z), 2015-10-12
Supplement: MOESM1 [file 9745164]

# CompuSyn Report

**Experiment Name:** HCC1806 72 h  
**Date:**  
**File Name:** C:\Users\Rishabh\Desktop\CI calculation\HCC1806 three day.cse

## Description

**Drug:** Resveratrol (Res) [micromolar]  
**Drug:** Pterostilbene (Ptero) [micromolar]  
**Drug Combo:** Res/Ptero (R/P) (Res+Ptero)

Data for Drug: Res [micromolar]

### Dose Effect

5.0 0.87  
 10.0 0.87  
 15.0 0.701

3 data points entered.

**X-int:** 1.74918

**Y-int:** 1.49019 +/- 0.66533

**m:** -0.8519 +/- 0.68002

**Dm:** 56.1280

**r:** -0.7816

Data for Drug: Ptero [micromolar]

### Dose Effect

5.0 0.825  
 10.0 0.732  
 15.0 0.634

3 data points entered.

**X-int:** 1.45889

**Y-int:** 1.31004 +/- 0.08633

**m:** -0.8980 +/- 0.08824

**Dm:** 28.7665

**r:** -0.9952

Data for Non-Constant Combo: R/P (Res+Ptero)

### Dose Res Dose Ptero Effect

|      |      |       |
|------|------|-------|
| 5.0  | 5.0  | 0.848 |
| 5.0  | 10.0 | 0.63  |
| 5.0  | 15.0 | 0.688 |
| 10.0 | 5.0  | 0.651 |
| 10.0 | 10.0 | 0.637 |

|      |      |       |
|------|------|-------|
| 10.0 | 15.0 | 0.439 |
| 15.0 | 5.0  | 0.485 |
| 15.0 | 10.0 | 0.509 |
| 15.0 | 15.0 | 0.409 |

9 data points entered.

### Dose-Effect Curve

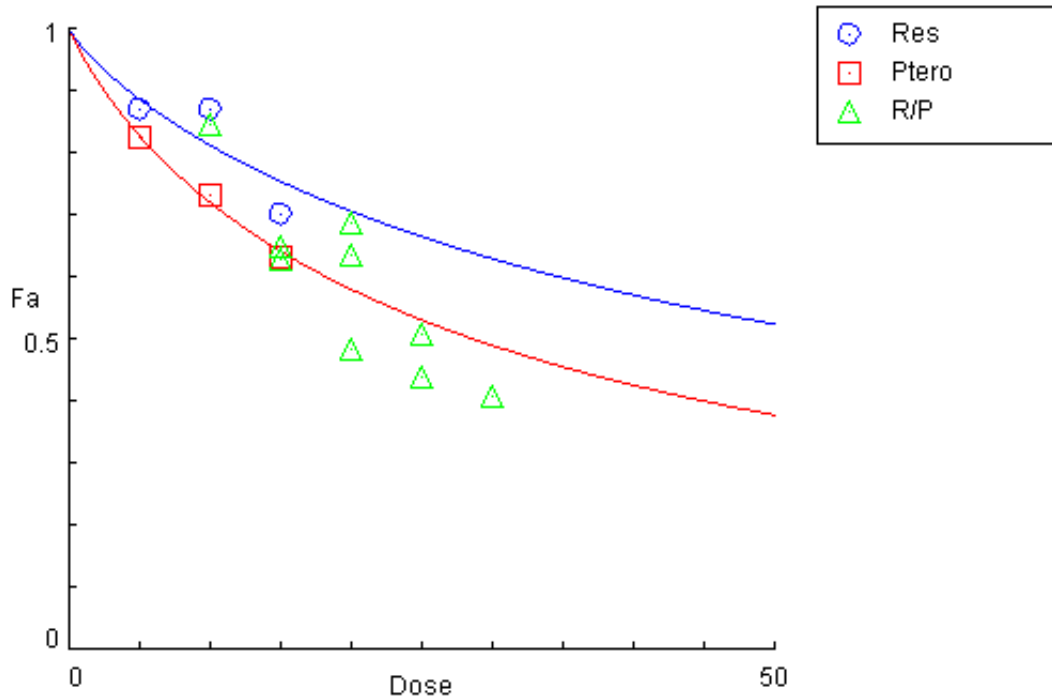

### Median-Effect Plot

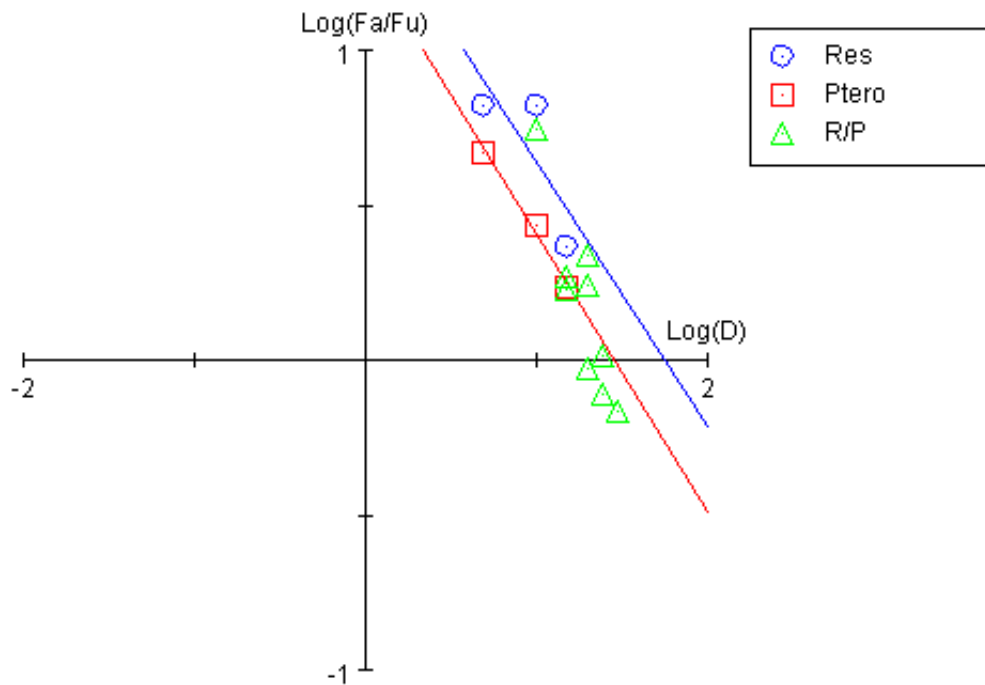

## CI Data for Non-Constant Combo: R/P (Res+Ptero)

| Dose Res | Dose Ptero | Effect | CI      |
|----------|------------|--------|---------|
| 5.0      | 5.0        | 0.848  | 1.84887 |
| 5.0      | 10.0       | 0.63   | 0.79518 |
| 5.0      | 15.0       | 0.688  | 1.48331 |
| 10.0     | 5.0        | 0.651  | 0.71838 |
| 10.0     | 10.0       | 0.637  | 0.99502 |
| 10.0     | 15.0       | 0.439  | 0.53043 |
| 15.0     | 5.0        | 0.485  | 0.41164 |
| 15.0     | 10.0       | 0.509  | 0.64063 |
| 15.0     | 15.0       | 0.409  | 0.51957 |

## Combination Index Plot

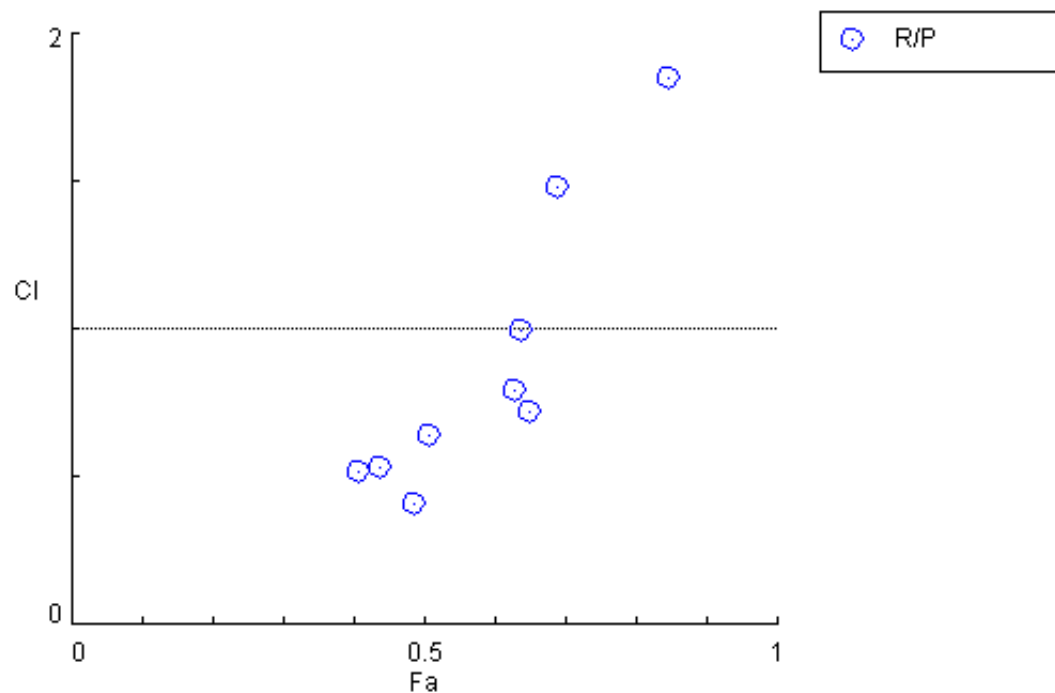

## DRI Data for Non-Constant Combo: R/P (Res+Ptero)

| Fa    | Dose Res | Dose Ptero | DRI Res | DRI Ptero |
|-------|----------|------------|---------|-----------|
| 0.848 | 7.46240  | 4.24145    | 1.49248 | 0.84829   |
| 0.63  | 30.0517  | 15.9033    | 6.01034 | 1.59033   |
| 0.688 | 22.1849  | 11.9243    | 4.43698 | 0.79496   |
| 0.651 | 27.0002  | 14.3671    | 2.70002 | 2.87342   |
| 0.637 | 29.0068  | 15.3782    | 2.90068 | 1.53782   |
| 0.439 | 74.8492  | 37.7995    | 7.48492 | 2.51997   |
| 0.485 | 60.2248  | 30.7549    | 4.01498 | 6.15099   |
| 0.509 | 53.8054  | 27.6360    | 3.58702 | 2.76360   |
| 0.409 | 86.4625  | 43.3426    | 5.76416 | 2.88951   |

## DRI Plot for Non-Constant Combo: R/P (Res+Ptero)

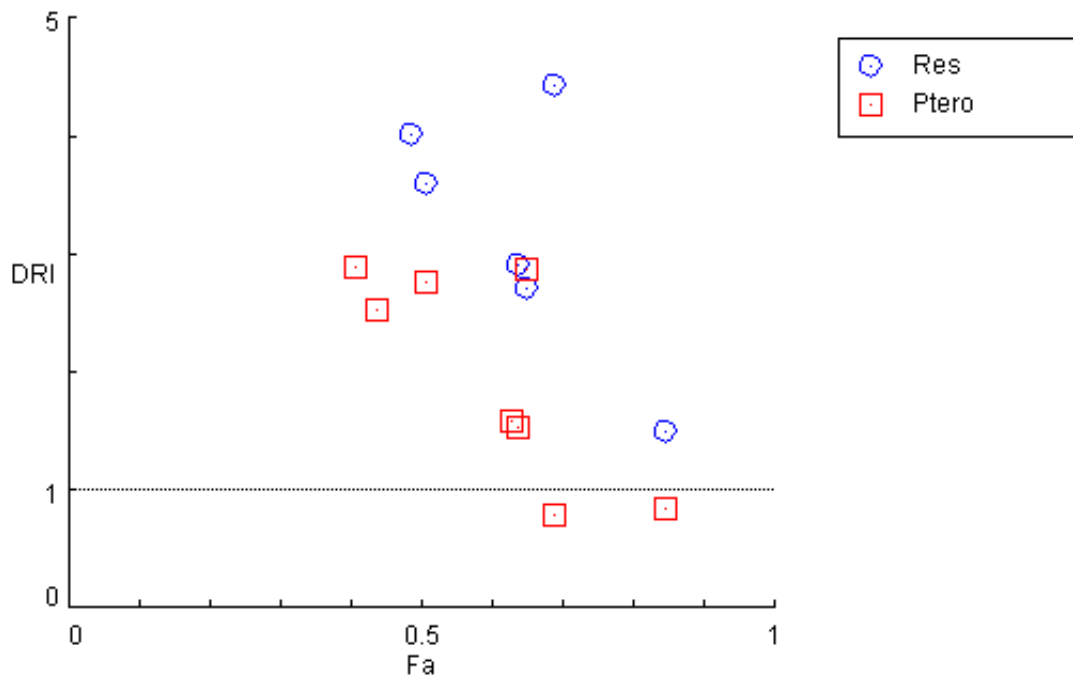

## Normalized Isobologram for Combo: R/P (Res+Ptero)

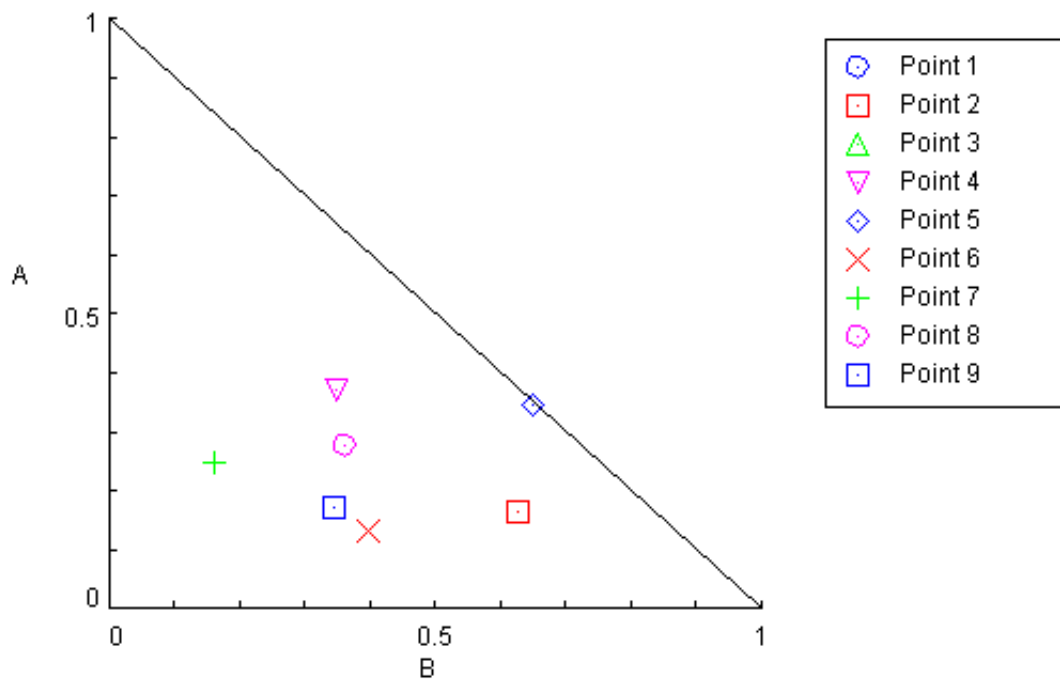

## Summary Table

**Experiment Name:** HCC1806 72 h  
**Date:**  
**File Name:** C:\Users\Rishabh\Desktop\CI calculation\HCC1806 three day.cse  
**Description**

**Drug:** Resveratrol (Res) [micromolar]  
**Drug:** Pterostilbene (Ptero) [micromolar]  
**Drug Combo:** Res/Ptero (R/P) (Res+Ptero)

| <b>Drug/Combo</b> | <b>Dm</b> | <b>m</b> | <b>r</b> |
|-------------------|-----------|----------|----------|
| Res               | 56.1280   | -0.8519  | -0.7816  |
| Ptero             | 28.7665   | -0.8980  | -0.9952  |

CI values at:

**Combo ED50 ED75 ED90 ED95**

Data for Fa = 0.5

| <b>Drug/Combo</b> | <b>CI value</b> | <b>Dose Res</b> | <b>Dose Ptero</b> |
|-------------------|-----------------|-----------------|-------------------|
| Res               |                 | 56.1280         |                   |
| Ptero             |                 |                 | 28.7665           |

Data for Fa = 0.75

| <b>Drug/Combo</b> | <b>CI value</b> | <b>Dose Res</b> | <b>Dose Ptero</b> |
|-------------------|-----------------|-----------------|-------------------|
| Res               |                 | 15.4574         |                   |
| Ptero             |                 |                 | 8.46364           |

Data for Fa = 0.9

| <b>Drug/Combo</b> | <b>CI value</b> | <b>Dose Res</b> | <b>Dose Ptero</b> |
|-------------------|-----------------|-----------------|-------------------|
| Res               |                 | 4.25689         |                   |
| Ptero             |                 |                 | 2.49016           |

Data for Fa = 0.95

| <b>Drug/Combo</b> | <b>CI value</b> | <b>Dose Res</b> | <b>Dose Ptero</b> |
|-------------------|-----------------|-----------------|-------------------|
| Res               |                 | 1.77085         |                   |
| Ptero             |                 |                 | 1.08354           |

Data for Fa = 0.97

| <b>Drug/Combo</b> | <b>CI value</b> | <b>Dose Res</b> | <b>Dose Ptero</b> |
|-------------------|-----------------|-----------------|-------------------|
| Res               |                 | 0.94876         |                   |
| Ptero             |                 |                 | 0.59940           |
