# Supplementary material for: Epigenetic-based combinatorial resveratrol and pterostilbene alters DNA damage response by affecting SIRT1 and DNMT enzyme expression, including SIRT1-dependent γ-H2AX and telomerase regulation in triple-negative breast cancer
Source: Springer Nature journal article supplement (doi:10.1186/s12885-015-1693-z), 2015-10-12
Supplement: MOESM2 [file 9745164]

# CompuSyn Report

**Experiment Name:** MDA-MB-157 72 h  
**Date:**  
**File Name:** C:\Users\Rishabh\Desktop\CI calculation\.cse  
**Description**

**Drug:** Resveratrol (Res) [micromolar]  
**Drug:** Pterostilbene (Ptero) [micromolar]  
**Drug Combo:** Res/Ptero (R/P) (Res+Ptero)

---

Data for Drug: Res [micromolar]

**Dose Effect**

5.0 0.975

10.0 0.951

15.0 0.886

3 data points entered.

**X-int:** 1.84413

**Y-int:** 2.61601 +/- 0.32156

**m:** -1.4186 +/- 0.32867

**Dm:** 69.8435

**r:** -0.9742

---

Data for Drug: Ptero [micromolar]

**Dose Effect**

5.0 0.925

10.0 0.778

15.0 0.754

3 data points entered.

**X-int:** 1.49171

**Y-int:** 1.97843 +/- 0.38188

**m:** -1.3263 +/- 0.39032

**Dm:** 31.0248

**r:** -0.9593

---

Data for Non-Constant Combo: R/P (Res+Ptero)

**Dose Res Dose Ptero Effect**

5.0 5.0 0.735

5.0 10.0 0.699

5.0 15.0 0.702

10.0 5.0 0.709

10.0 10.0 0.677

10.0 15.0 0.684

15.0 5.0 0.568

15.0 10.0 0.553

15.0 15.0 0.477

9 data points entered.

Dose-Effect Curve

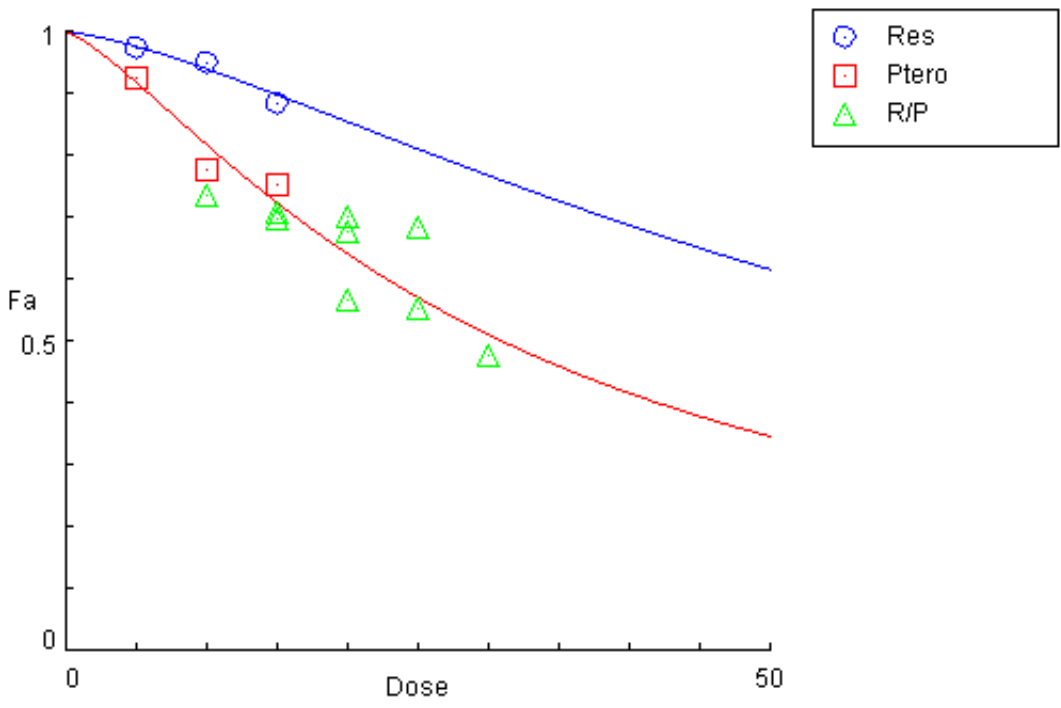

Median-Effect Plot

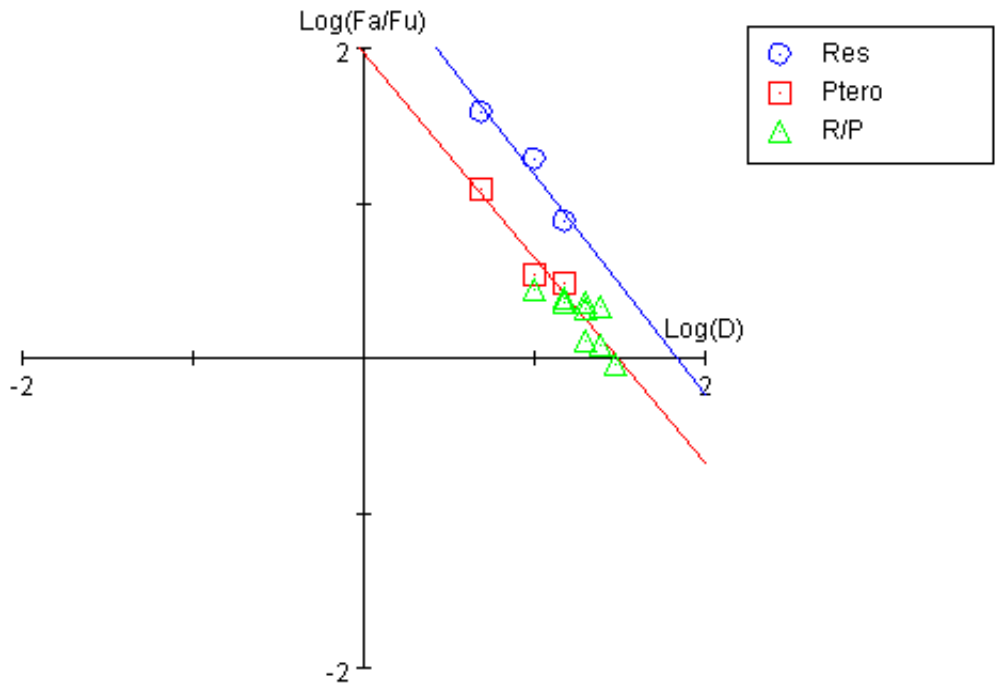

CI Data for Non-Constant Combo: R/P (Res+Ptero)

| Dose Res | Dose Ptero | Effect | CI      |
|----------|------------|--------|---------|
| 5.0      | 5.0        | 0.735  | 0.49473 |
| 5.0      | 10.0       | 0.699  | 0.73805 |
| 5.0      | 15.0       | 0.702  | 1.05345 |
| 10.0     | 5.0        | 0.709  | 0.58364 |

|      |      |       |         |
|------|------|-------|---------|
| 10.0 | 10.0 | 0.677 | 0.80436 |
| 10.0 | 15.0 | 0.684 | 1.11223 |
| 15.0 | 5.0  | 0.568 | 0.45857 |
| 15.0 | 10.0 | 0.553 | 0.62794 |
| 15.0 | 15.0 | 0.477 | 0.65233 |

Combination Index Plot

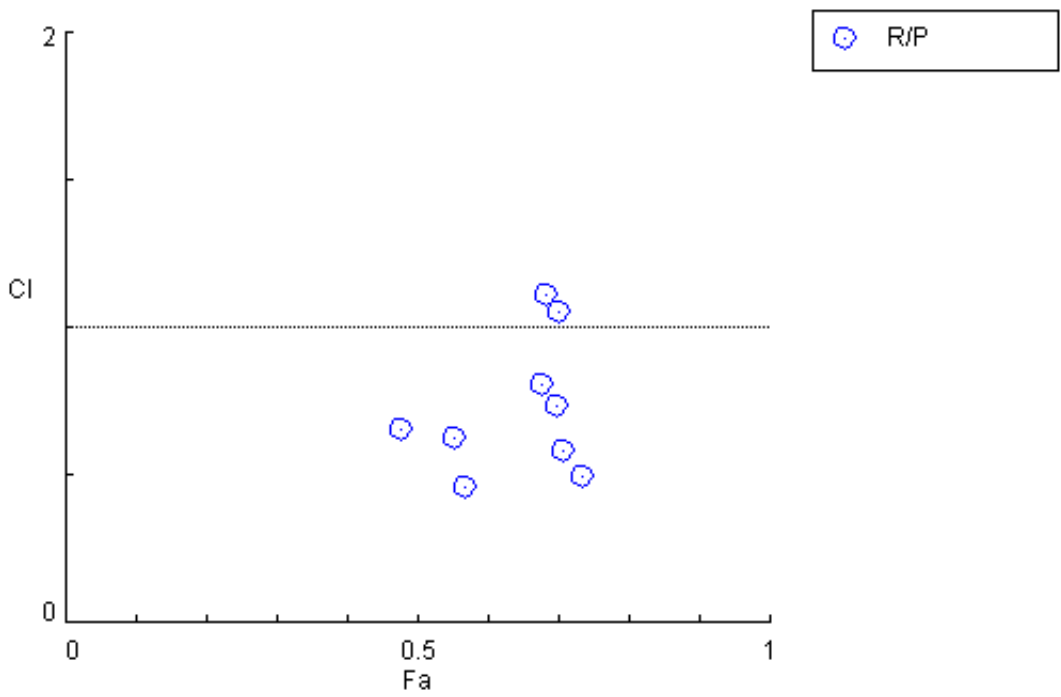

DRI Data for Non-Constant Combo: R/P (Res+Ptero)

| Fa    | Dose Res | Dose Ptero | DRI Res | DRI Ptero |
|-------|----------|------------|---------|-----------|
| 0.735 | 34.0259  | 14.3768    | 6.80518 | 2.87536   |
| 0.699 | 38.5640  | 16.4368    | 7.71279 | 1.64368   |
| 0.702 | 38.1772  | 16.2605    | 7.63544 | 1.08404   |
| 0.709 | 37.2811  | 15.8527    | 3.72811 | 3.17053   |
| 0.677 | 41.4542  | 17.7578    | 4.14542 | 1.77578   |
| 0.684 | 40.5239  | 17.3319    | 4.05239 | 1.15546   |
| 0.568 | 57.5882  | 25.2398    | 3.83922 | 5.04797   |
| 0.553 | 60.1142  | 26.4257    | 4.00761 | 2.64257   |
| 0.477 | 74.5266  | 33.2549    | 4.96844 | 2.21699   |

DRI Plot for Non-Constant Combo: R/P (Res+Ptero)

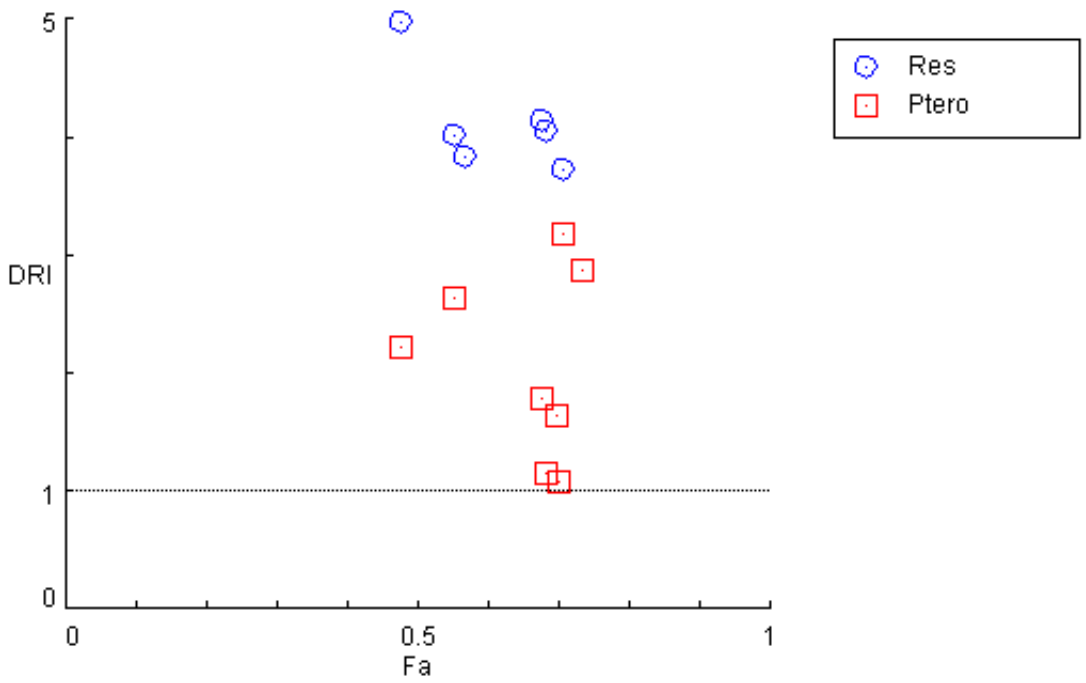

Normalized Isobologram for Combo: R/P (Res+Ptero)

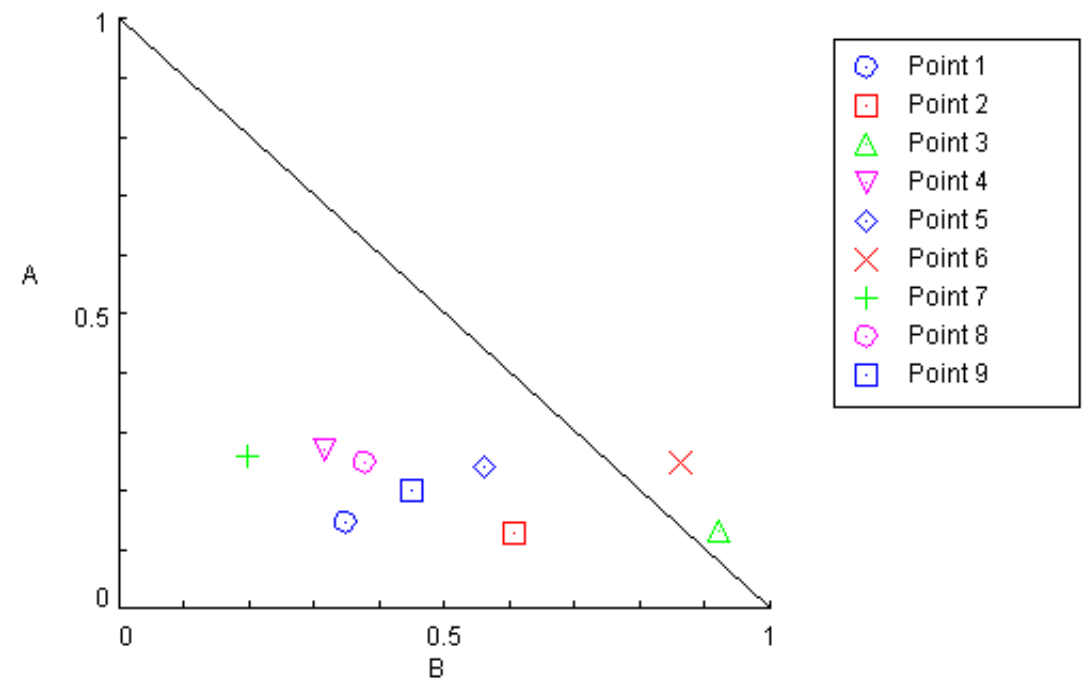

## Summary Table

**Experiment Name:** MDA-MB-157 72 h  
**Date:**  
**File Name:** C:\Users\Rishabh\Desktop\CI calculation\.cse  
**Description:**  
**Drug:** Resveratrol (Res) [micromolar]  
**Drug:** Pterostilbene (Ptero) [micromolar]  
**Drug Combo:** Res/Ptero (R/P) (Res+Ptero)

| <b>Drug/Combo</b> | <b>Dm</b> | <b>m</b> | <b>r</b> |
|-------------------|-----------|----------|----------|
| Res               | 69.8435   | -1.4186  | -0.9742  |
| Ptero             | 31.0248   | -1.3263  | -0.9593  |

---

CI values at:

**Combo ED50 ED75 ED90 ED95**

---

Data for Fa = 0.5

**Drug/Combo CI value Dose Res Dose Ptero**

|       |         |         |  |
|-------|---------|---------|--|
| Res   | 69.8435 |         |  |
| Ptero |         | 31.0248 |  |

---

Data for Fa = 0.75

**Drug/Combo CI value Dose Res Dose Ptero**

|       |         |         |  |
|-------|---------|---------|--|
| Res   | 32.1948 |         |  |
| Ptero |         | 13.5508 |  |

---

Data for Fa = 0.9

**Drug/Combo CI value Dose Res Dose Ptero**

|       |         |         |  |
|-------|---------|---------|--|
| Res   | 14.8404 |         |  |
| Ptero |         | 5.91867 |  |

---

Data for Fa = 0.95

**Drug/Combo CI value Dose Res Dose Ptero**

|       |         |         |  |
|-------|---------|---------|--|
| Res   | 8.76364 |         |  |
| Ptero |         | 3.36936 |  |

---

Data for Fa = 0.97

**Drug/Combo CI value Dose Res Dose Ptero**

|       |         |         |  |
|-------|---------|---------|--|
| Res   | 6.02444 |         |  |
| Ptero |         | 2.25660 |  |
